# Supplementary material
Source: PubMed Central journal article supplement (PMC2919908)
Supplement: 0912855107_pnas.200912855SI.pdf [file 0912855107_pnas.200912855SI.pdf]

# Supporting Information

Zhou et al. 10.1073/pnas.0912855107

## SI Materials and Methods

**Immunohistochemical Analysis and in Situ Hybridization.** Bones fixed in 4% paraformaldehyde in PBS (pH 7.4) were decalcified and treated for CryoJane frozen sections as described by Jiang et al. (1). We used the same decalcification procedure for the paraffin sections as for the frozen sections. Both paraffin and frozen sections were used for immunohistochemical analysis. Sections were treated with hyaluronidase [2 mg/mL in PBS (pH 5.0)] at 37 °C for 1 h and incubated with anti-Col X (mouse monoclonal anti-human recombinant Col X generously provided by Klaus von der Mark, Nikolaus Fiebiger Centre of Molecular Medicine, University Erlangen-Nuernberg), anti-eGFP (A11122; Invitrogen), anti-Opg (sc-8468; Santa Cruz), or anti-CD45 (BAM114; R&D Systems). Sections for anti-Runx2 (sc-10758; Santa Cruz) were heated in 10 mM sodium citrate (pH 6.0) at 95 °C for 5 min. Sections for anti-Aggregan antibody (MAB19310; Chemicon) were treated with chondroitinase ABC. Sections for anti-Col IV (ab19808; Abcam) were treated with 0.1% trypsin.

**X-ray,  $\mu$ CT, and Histomorphometry Analyses.** X-ray images of mice skeletons were generated by Faxitron. Femurs were fixed in 4% paraformaldehyde overnight and kept in 70% ethanol for  $\mu$ CT scanning (eXplore GE Locus SP; GE Healthcare). We then analyzed the  $\mu$ CT images using MicroView 2.2 software (GE Healthcare). Histomorphometry results were analyzed with the OsteoMeasure histomorphometry system (OsteoMetrics).

**RNA Isolation and Quantitative PCR Analyses.** RNA was isolated from the bones using TRIzol reagent (Invitrogen) according to the manufacturer's protocol. After purification, the total RNA was treated with Turbo DNase (Ambion) and reverse transcribed into first-strand cDNA using a high-capacity cDNA reverse transcription kit (Applied Biosystems). We used 100 ng cDNA per PCR. The TaqMan primer-probe combinations were products of Applied Biosystems.

**EMSA and Transfection.** Procedures for electrophoretic mobility shift assay (EMSA) and transfections were as described previously (2, 3). The 2-Kb *Sost* promoter was PCR amplified from RP24-131M12 (BACPAC Resources) and cloned into p<sup>GL3</sup>-Basic vector.

**In Vitro Osteoclastogenesis.** Bone marrow cells of 2-mo-old mice were flushed out of humeri and femurs with  $\alpha$ -MEM and treated with red blood cell lysis buffer (8.3 g/L NH<sub>4</sub>Cl, 1 g/L sodium bicarbonate, and 0.4 g/L EDTA). The remaining cells were cultured in complete  $\alpha$ -MEM media containing 5% L292 conditional media until confluent to isolate the monocytes. The monocytes were then replated in complete  $\alpha$ -MEM media containing 5% L292 conditional media and 50 ng/mL RANKL to induce osteoclastogenesis.

**In Vitro Osteoblastogenesis.** Primary osteoblasts were isolated from P24 mice. In brief, calvariae were minced, washed by PBS, and subjected to five sequential digestions (for 15, 10, 10, 10, and 10 min, respectively) in  $\alpha$ -MEM containing 2 mg/mL Dispase II (Roche) and 1 mg/mL Collagenase P (Roche) at 37 °C. The cells from the second to fifth digestions were combined and cultured in  $\alpha$ -MEM supplemented with 10% FBS for 3–5 d. The cells were reseeded in 12-well plates at a density of  $5 \times 10^4$ /well. Differentiation was initiated upon confluence by the addition of 0.1 mg/mL ascorbic acid (Sigma) and 5 mM  $\beta$ -glycerol phosphate (Sigma). Bone marrow stromal cells (BMSC) were isolated from

the bone marrow of 2-mo-old mice. To isolate the BMSC, the bone marrow cells were cultured in  $\alpha$ -MEM supplemented with 15% FBS for 7 d (half of the media was changed on day 4). The BMSC were seeded in 12-well plates at a density of  $1.5 \times 10^5$ /well. Once confluent, osteogenesis was initiated by the addition of osteogenic media (5 mM  $\beta$ -glycerol phosphate, 0.1 mg/mL ascorbic acid, and 10 nM dexamethasone). The osteogenic media was changed every 2–3 d.

**EM Analysis of Osteocytes.** For resin-casted SEM, long bones were dissected and fixed in 4% paraformaldehyde for 24 h. The tissue specimens were dehydrated in ascending concentrations of ethanol (from 70% to 100%), embedded in methyl methacrylate, and then surface polished using 1  $\mu$ m and 0.3  $\mu$ m Alpha Micro Polish Alumina II (Buehler) in a soft-cloth rotating wheel. The bone surface was acid etched with 37% phosphoric acid for 2–10 s, followed by 5% sodium hypochlorite for 5 min. The samples were then coated with gold and palladium as described previously (4) and examined using an FEI/Philips XL30 Field-Emission Environmental Scanning Electron Microscope.

For back-scattered SEM (BSEM), the long bones were fixed overnight in 2% paraformaldehyde and 2% glutaraldehyde buffered at pH 7.4 with 0.1 M sodium cacodylate. Samples were then rinsed three times (20 min each time) in 0.1 M cacodylate buffer solution followed by secondary fixation (1 h) in a solution of 1% osmium tetroxide in 0.1 M cacodylate buffer. The BSEM samples were then coated with carbon and examined using an FEI/Philips XL30 Field-Emission Environmental Scanning Electron Microscope.

For transmission electron microscopy (TEM), the small bone samples (1–3 mm<sup>3</sup>) were fixed in the same way as the BSEM samples. The small bone samples were then dehydrated with an ethanol series and processed for embedding in eEpon resin (Poly/Bed 812; Polysciences Inc.) for 2 h. Complete polymerization was performed in a 60 °C oven for 48 h. Thin sections (100 nm) were then cut using a diamond knife and mounted on copper grids (300 mesh). The sections were stained with uranyl acetate and lead citrate and examined using a Philips CM12 Scanning Transmission Electron Microscope.

**Chromatin Immunoprecipitation (ChIP) Assay.** Approximately  $1.0 \times 10^7$  BMP2-treated MC3T3 cells were incubated with 1% formaldehyde in serum-free media for 20 min followed by 125 mM glycine. Cells were washed with cold PBS, resuspended in 10 volumes of cell lysis buffer [25 mM Hepes (pH 7.9), 1.5 mM MgCl<sub>2</sub>, 10 mM KCl, 0.1% Nonidet P-40, 1 mM DTT, 0.5 mM PMSF and protease inhibitor mixture] and homogenized to release the nuclei, which were then lysed with nuclear lysis buffer [50 mM Hepes (pH 7.9), 140 mM NaCl, 1 mM EDTA, 1% Triton X-100, 0.1% Na-deoxycholate, 0.1% SDS, 0.5 mM PMSF, protease inhibitor mixture]. Nuclear extracts were sonicated and cleared by centrifugation. Sonicated chromatin was diluted in lysis buffer without SDS to bring the final concentration of SDS to 0.05%. The antibodies were first conjugated to magnetic-coated protein G beads (magnetic Dynabeads Protein G; Invitrogen), which were previously blocked with 0.5% BSA in PBS. After overnight immunoprecipitation with rabbit anti-Osx and anti-IgG antibodies at 4 °C, the immunoprecipitated complexes were collected using a magnetic stand. Washing, reversal of cross-links, and purification of DNA from immunocomplexes were done using EZ ChIP Kit (Millipore) as per instructions. Quantitative PCR reactions were performed with 500 nM primers, 5  $\mu$ L 2 $\times$  SYBR Green PCR Master Mix (Applied Biosystems), 2  $\mu$ L











Quantitative PCR analysis. RNA was isolated from the humeri of tamoxifen-treated 6-wk-old wild-type and *Osx<sup>postnatal</sup>* mutant mice. (E) Quantitative PCR analysis. RNA was isolated from the humeri of P24 tamoxifen-treated mice. (F) IHC of anti-CD45 and anti-type IV on the humerus sections of tamoxifen-treated 6-wk-old wild-type and *Osx<sup>postnatal</sup>* mutant mice. (G) IHC of anti-OPG on the humerus sections of tamoxifen-treated 6-wk-old wild-type and *Osx<sup>postnatal</sup>* mutant mice.

**Table S1. Histomorphometry analysis of bone and bone formation parameters in lumbar vertebrae of 6-wk-old vehicle and tamoxifen-treated controls and tamoxifen-treated *Osx<sup>postnatal</sup>* mutant mice**

|          | BV/TV% ± SD    | Tb.Th (mcm) ± SD         | Tb.N (mm <sup>-1</sup> ) ± SD          | Tb.Sp (mcm) ± SD    |
|----------|----------------|--------------------------|----------------------------------------|---------------------|
| Wt/Veh   | 18.55 ± 2.57   | 28.78 ± 0.19             | 6.44 ± 0.85                            | 128.25 ± 20.89      |
| Wt/Tam   | 23.79 ± 0.82*  | 30.07 ± 1.77             | 7.92 ± 0.37**                          | 96.36 ± 4.43**      |
| Null/Tam | 16.85 ± 2.37   | 28.97 ± 1.75             | 5.80 ± 0.46                            | 144.20 ± 15.00      |
|          | Ob.S/BS% ± SD  | N. Ob/B. Pm (Ob/mm) ± SD | N. Ob/ T. Ar (Ob/mm <sup>2</sup> ± SD) | BFR/BS (mcm/d) ± SD |
| Wt/Veh   | 25.80 ± 1.78** | 17.05 ± 1.12**           | 219.17 ± 27.47**                       | 0.56 ± 0.031**      |
| Wt/Tam   | 43.98 ± 3.94** | 26.85 ± 2.58**           | 424.71 ± 35.30**                       | 0.44 ± 0.04**       |
| Null/Tam | 11.02 ± 2.49   | 7.48 ± 2.39              | 85.63 ± 23.73                          | 0.07 ± 0.021        |
|          | OS/BS% ± SD    | OS/T.Ar ± SD             | MS/BS% ± SD                            | MAR (mcm/d) ± SD    |
| Wt/Veh   | 7.29 ± 1.61*   | 0.96 ± 0.33*             | 24.01 ± 0.75**                         | 2.34 ± 0.18**       |
| Wt/Tam   | 22.68 ± 3.90** | 3.58 ± 0.51**            | 20.28 ± 1.83**                         | 2.19 ± 0.06**       |
| Null/Tam | 2.11 ± 1.18    | 0.24 ± 0.13              | 6.99 ± 1.89                            | 1.02 ± 0.04         |

*n* = 3/genotype group.  
\**P* < 0.05, \*\**P* < 0.001.

**Table S2. Histomorphometry analysis of osteoclasts in cortex**

|          | Oc. S. endo/endo<br>S% ± SD   | Oc. S. peri/peri<br>S % ± SD  | Oc. S. inner/inner<br>% ± SD        | Oc. S. total/total<br>S % ± SD       |
|----------|-------------------------------|-------------------------------|-------------------------------------|--------------------------------------|
| Wt/Tam   | 3.46 ± 1.12**                 | 22.22 ± 3.86*                 | 2.70 ± 2.61*                        | 11.0 ± 0.7                           |
| Null/Tam | 15.03 ± 1.46                  | 4.47 ± 1.97                   | 10.28 ± 3.07                        | 9.97 ± 1.30                          |
|          | Oc. endo/endo<br>(Oc/mm) ± SD | Oc. peri/peri<br>(Oc/mm) ± SD | Oc. N inner/inner S<br>(Oc/mm) ± SD | Total Oc. N/total BS<br>(Oc/mm) ± SD |
| Wt/Tam   | 1.61 ± 0.43**                 | 7.81 ± 1.88*                  | 1.42 ± 1.31*                        | 4.10 ± 0.67                          |
| Null/Tam | 6.16 ± 0.55                   | 1.91 ± 0.30                   | 4.89 ± 1.22                         | 4.38 ± 0.63                          |

Endo, endosteum; peri, periosteum; inner, the area between endosteum and periosteum; total, the sum of peri, endo, and inner. *n* = 3/genotype group.  
\**P* < 0.05, \*\**P* < 0.001.
